# Supplementary material
Source: PubMed Central journal article supplement (PMC3671860)
Supplement: NIHMS458571-supplement-1_si_001.pdf [file NIHMS458571-supplement-1_si_001.pdf]

**Supporting Information for**

**Remediation of polychlorinated biphenyl impacted sediment by**

**concurrent bioaugmentation with anaerobic halorespiring and**

**aerobic degrading bacteria**

Rayford B Payne<sup>†</sup>, Sonja K. Fagervold<sup>‡</sup>, Harold D May<sup>§</sup>, Kevin R Sowers<sup>†\*</sup>

<sup>†</sup> Department of Marine Biotechnology, Institute of Marine and Environmental Technology,

University of Maryland Baltimore County, Baltimore MD

<sup>‡</sup>UPMC Univ Paris 06, FRE 3350, LECOB, Observatoire Océanologique, F-66650,

Banyuls/Mer, France

<sup>§</sup> Marine Biomedicine and Environmental Science Center, Department of Microbiology and

Immunology, Medical University of South Carolina, Charleston SC

\* Corresponding author: Kevin Sowers, Department of Marine Biotechnology, Institute of Marine and Environmental Technology, 701 E. Pratt St., Baltimore, Maryland 21202  
Telephone: (410) 234-8878/FAX: (410) 234-8896, e-mail: Sowers@umbc.edu

Number of pages: 4

Number of tables: 2

Number of figures: 1

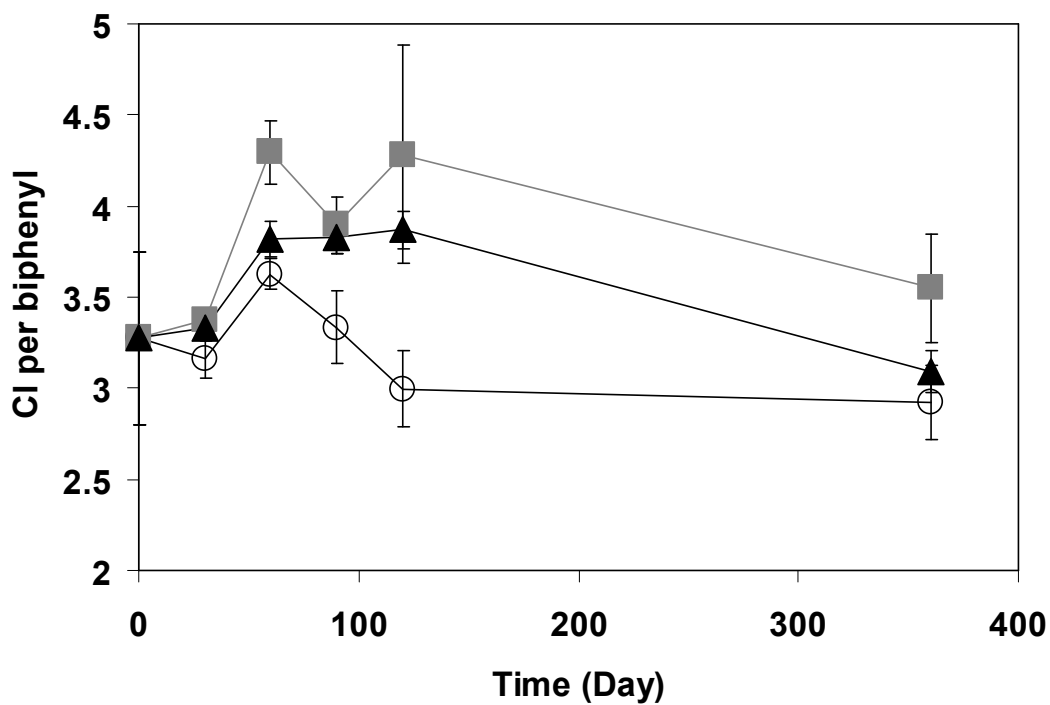

**Figure S1.** Changes in chlorines per biphenyl over 365 days in mesocosms. Average and standard deviation at time 0 (N=27) and at other times (N=3). *Open circles* (○), GAC plus spent growth medium; *Grey squares* (■), GAC plus LB400; *Black triangles* (▲) GAC plus LB400 and DF1. Error bars are calculated from replicate sediment subsamples.

**Table S1.** PCR primers used in this study.

| Primers used in this study |                          |                                       |                                           |
|----------------------------|--------------------------|---------------------------------------|-------------------------------------------|
| Name                       | Sequence 5'-3'           | Target Gene                           | Reference                                 |
| CIOP0                      | CGATCTGCGGCTGGACGGGCTCAT | 298 nt LB400<br><i>bphA1</i> upstream | (Beltrametti,<br>Renierob et al.<br>2001) |
| CIOP1                      | AGATTCGTCGCTGTCGTGCACCTC | 298 nt LB400<br><i>bphA1</i> upstream | (Beltrametti,<br>Renierob et al.<br>2001) |
| SKFPat9F                   | GACAATGAGGACCCGGAATT     | DF1 reductive<br>dehalogenase         | This work                                 |
| SKFPat9R                   | TCCGCCAAAATAACGAACTG     | DF1 reductive<br>dehalogenase         | This work                                 |
| Chl348F                    | GAGGCAGCAGCAAGGAA        | Chloroflexi 16S<br>rRNA               | (Fagervold,<br>Watts et al.<br>2005)      |
| Dehal884R                  | GGCCGGACACTTAAAGCG       | Chloroflexi 16S<br>rRNA               | (Fagervold,<br>Watts et al.<br>2005)      |

**Table S2.** Inferred pathways resulting from PCB dechlorination and degradation in mesocosm bioaugmented with DF1 and LB400 adsorbed to GAC with lactate added. Numbers in parentheses indicate position of Cl atoms on biphenyl ring. Symbols indicate: ↓, a decrease in absolute amount after 365 days; ↑, an increase in absolute amount after 365 days; NA, congener not assayed by this method; ND, congener not detected; NC, no change in absolute amount of congener; LB400, congener inferred to be degraded by LB400.

| Substrate Congener | Possible Intermediate Congeners                       |                                      |                                          |                                   | Final Congeners                      |
|--------------------|-------------------------------------------------------|--------------------------------------|------------------------------------------|-----------------------------------|--------------------------------------|
| 206(23456-2345) ↓  | 199(2345-2356)NC<br>198(23456-235) ↓                  | 178(2356-235) ↓                      | 135(235-236) ↓                           | 94(236-25) ↓<br>95(235-26) ↓LB400 | 53(25-26) ↑                          |
| 205(23456-345) ↓   | 193(2356-345) ↓<br>192(23456-35) ↓                    | 165(2356-35) ↑                       | 113(236-35)ND                            |                                   | 73(26-35) ↓LB400                     |
| 203(23456-245) ↓   | 187(2356-246)NA<br>183(2346-245)NC                    | 149(236-245) ↓                       | 95(236-25) ↓ LB400<br>102(245-26) ↓LB400 |                                   | 53(25-26) ↑<br>51(24-26) ↓LB400      |
| 196(2345-2346) ↓   | 175(2346-235)ND<br>182(2345-246) ↑                    | 164(235-246)ND                       |                                          |                                   | 53(25-26) ↑                          |
| 191(2346-345) ↓    | 168(246-345)NA<br>161(2346-35) ↓                      | 121(246-35)NA<br>113(236-35) ↑       |                                          |                                   | 73(26-35) ↓LB400                     |
| 193(2356-345) ↓    | 165(2356-35) ↑                                        | 113(236-35) ↑                        |                                          |                                   | 73(26-35) ↓LB400                     |
| 192(23456-35) ↓    | 165(2356-35) ↑                                        | 113(236-35) ↑                        |                                          |                                   | 73(26-35) ↓LB400                     |
| 126(345-34) ↓      |                                                       |                                      |                                          |                                   | 79(34-35)ND                          |
| 129(2345-23) ↓     | 83(235-23)NA                                          |                                      |                                          |                                   | 44(23-25)NC                          |
| 178(2356-235) ↓    | 151(2356-25) ↓<br>135(235-236) ↓                      | 95(236-25)↓LB400<br>94(235-26)↓LB400 |                                          |                                   | 53(25-26) ↑                          |
| 146(235-245) ↓     | 101(245-25)NC<br>90(235-24) ↑                         |                                      |                                          |                                   | 52(25-25) ↓LB400<br>49(24-25) ↓LB400 |
| 139(2346-24) ↓     | 100(246-24) ↑                                         |                                      |                                          |                                   |                                      |
| 149(236-245) ↓     | 125(245-26)NA<br>95(236-25)↓LB400<br>91(236-24) LB400 |                                      |                                          |                                   | 53(25-26) ↑<br>51(24-26) ↓           |
| 123(345-24) ↓      |                                                       |                                      |                                          |                                   | 68(24-35) ↑                          |
| 144(2346-25) ↓     |                                                       |                                      |                                          |                                   | 103(246-25) ↑                        |
| 124(345-25) ↓      |                                                       |                                      |                                          |                                   | 72(25-35)NC                          |
| 147(2356-24) ↓     | 91(236-24)↓LB400                                      |                                      |                                          |                                   | 51(24-26) ↓                          |
| 145(2346-26) ↓     |                                                       |                                      |                                          |                                   | 104(246-26) ↑<br>96(236-26)NA        |
| 99(245-24) ↓       |                                                       |                                      |                                          |                                   | 49(24-25) ↓                          |
| 74(245-4) ↓        |                                                       |                                      |                                          |                                   | 31(25-4) NC<br>28(24-4) ↓            |
| 94(235-26) ↓       |                                                       |                                      |                                          |                                   | 53(25-26) ↑                          |
